# Supplementary material for: HLA-G Gene Variability Is Associated with Papillary Thyroid Carcinoma Morbidity and the HLA-G Protein Profile
Source: MDPI journal article supplement (doi:10.3390/ijms241612858), 2023-08-16
Supplement: s1 [file s1]

---

## SUPPLEMENTARY MATERIAL

Article

# HLA-G Gene Variability Is Associated with Papillary Thyroid Carcinoma Morbidity and the HLA-G Protein Profile

Bruna C. Bertol <sup>1,2,\*</sup>, Guilherme Debortoli <sup>3</sup>, Fabrício C. Dias <sup>4</sup>, Jéssica N. G. de Araújo <sup>5</sup>, Luana S. M. Maia <sup>4</sup>, Bibiana S. de Almeida <sup>4</sup>, Nathalie L. de Figueiredo-Feitosa <sup>6</sup>, Luiz Carlos C. de Freitas <sup>7</sup>, Erick C. Castelli <sup>8</sup>, Celso T. Mendes-Junior <sup>9</sup>, Vivian N. Silbiger <sup>5</sup>, Léa M. Z. Maciel <sup>6</sup> and Eduardo A. Donadi <sup>1,4,\*</sup>

<sup>1</sup> Postgraduate Program of Basic and Applied Immunology, Ribeirão Preto Medical School, University of São Paulo, Ribeirão Preto 14049-900, Brazil

<sup>2</sup> Princess Margaret Cancer Centre, University Health Network, Toronto, ON M5G 2M9, Canada

<sup>3</sup> Department of Anthropology, University of Toronto at Mississauga, Mississauga, ON L5L 1C6, Canada; guilherme.debortoli@mail.utoronto.ca

<sup>4</sup> Division of Clinical Immunology, Department of Medicine, Ribeirão Preto Medical School, University of São Paulo, Ribeirão Preto 14049-900, Brazil; diasfc@gmail.com (F.C.D.); luana.sellamottamaia@unibas.ch (L.S.M.M.); bibianasgorla@hotmail.com (B.S.d.A.)

<sup>5</sup> Department of Clinical Analysis and Toxicology, Federal University of Rio Grande do Norte, Natal 59012-570, Brazil; jessnaysub@hotmail.com (J.N.G.d.A.); viviansilbiger@hotmail.com (V.N.S.)

<sup>6</sup> Division of Endocrinology and Metabolism, Department of Medicine, Ribeirão Preto Medical School, University of São Paulo, Ribeirão Preto 14049-900, Brazil; nathaliefigueiredo@yahoo.com.br (N.L.d.F.-F.); leamaciel@hcrp.usp.br (L.M.Z.M.)

<sup>7</sup> Department of Ophthalmology, Otorhinolaryngology and Head and Neck Surgery, Ribeirão Preto Medical School, University of São Paulo, Ribeirão Preto 14049-900, Brazil; lcconti@fmrp.usp.br

<sup>8</sup> Department of Pathology, School of Medicine, São Paulo State University, Botucatu 18618-687, Brazil; erick.castelli@unesp.br

<sup>9</sup> Departamento de Química, Faculdade de Filosofia, Ciências e Letras de Ribeirão Preto, Universidade de São Paulo, Ribeirão Preto 14049-900, Brazil; ctmendes@ffclrp.usp.br

\* Correspondence: bruna.bertol@uhn.ca (B.C.B.); eadonadi@fmrpusp.br (E.A.D.); Tel.: +55-16-3602-2566 (E.A.D.)

**Table S1.** HLA-G 5'UTR, coding and 3'UTR haplotypes in papillary thyroid carcinoma (PTC) patients and control subjects.

| HLA-G haplotypes |                                    | Total      |               | Controls  |               | PTC patients |               | OR            | 95% CI                 | P             |
|------------------|------------------------------------|------------|---------------|-----------|---------------|--------------|---------------|---------------|------------------------|---------------|
|                  |                                    | n          | Freq.         | n         | Freq.         | n            | Freq.         |               |                        |               |
| 5'UTR            | 1 G010102a                         | 201        | 0.3295        | 99        | 0.3214        | 102          | 0.3377        | 1.0767        | 0.7681 - 1.5092        | 0.7305        |
|                  | 2 G010101a                         | 129        | 0.2115        | 59        | 0.1916        | 70           | 0.2318        | 1.2734        | 0.8623 - 1.8804        | 0.2352        |
|                  | 3 <b>G0104a</b>                    | <b>78</b>  | <b>0.1279</b> | <b>50</b> | <b>0.1623</b> | <b>28</b>    | <b>0.0927</b> | <b>0.5273</b> | <b>0.3221 - 0.8632</b> | <b>0.0109</b> |
|                  | 4 G010101b                         | 41         | 0.0672        | 20        | 0.0649        | 21           | 0.0695        | 1.0762        | 0.5708 - 2.0288        | 0.8723        |
|                  | 5 G010101f                         | 40         | 0.0656        | 17        | 0.0552        | 23           | 0.0762        | 1.4111        | 0.7381 - 2.6978        | 0.3288        |
|                  | 6 G010101c                         | 33         | 0.0541        | 18        | 0.0584        | 15           | 0.0497        | 0.8420        | 0.4163 - 1.7031        | 0.7214        |
|                  | 7 G0103a                           | 26         | 0.0426        | 13        | 0.0422        | 13           | 0.0430        | 1.0208        | 0.4653 - 2.2395        | 1.0000        |
|                  | 8 G010101d                         | 16         | 0.0262        | 5         | 0.0162        | 11           | 0.0364        | 2.2907        | 0.7863 - 6.6736        | 0.1348        |
|                  | 9 G0103d                           | 16         | 0.0262        | 9         | 0.0292        | 7            | 0.0232        | 0.7883        | 0.2898 - 2.1445        | 0.8012        |
|                  | 10 G0103e                          | 15         | 0.0246        | 8         | 0.0260        | 7            | 0.0232        | 0.8898        | 0.3186 - 2.4851        | 1.0000        |
|                  | 11 G0104b                          | 3          | 0.0049        | 2         | 0.0065        | 1            | 0.0033        | 0.5083        | 0.0458 - 5.6353        | 1.0000        |
|                  | 12 G010102d                        | 3          | 0.0049        | 1         | 0.0032        | 2            | 0.0066        | 2.0467        | 0.1846 - 22.6903       | 0.6207        |
|                  | 13 G010101h                        | 2          | 0.0033        | 2         | 0.0065        | 0            | 0.0000        | 0.2026        | 0.0097 - 4.2385        | 0.4992        |
|                  | 14 G0103c                          | 2          | 0.0033        | 2         | 0.0065        | 0            | 0.0000        | 0.2026        | 0.0097 - 4.2385        | 0.4992        |
|                  | 15 G010101g                        | 1          | 0.0016        | 0         | 0.0000        | 1            | 0.0033        | 3.0697        | 0.1246 - 75.6491       | 0.4951        |
|                  | 16 G010101j                        | 1          | 0.0016        | 0         | 0.0000        | 1            | 0.0033        | 3.0697        | 0.1246 - 75.6491       | 0.4951        |
|                  | 17 G010101i                        | 1          | 0.0016        | 1         | 0.0032        | 0            | 0.0000        | 0.3388        | 0.0137 - 8.3505        | 1.0000        |
|                  | 18 G010102e                        | 1          | 0.0016        | 1         | 0.0032        | 0            | 0.0000        | 0.3388        | 0.0137 - 8.3505        | 1.0000        |
|                  | 19 G0104c                          | 1          | 0.0016        | 1         | 0.0032        | 0            | 0.0000        | 0.3388        | 0.0137 - 8.3505        | 1.0000        |
| Total [2n]       |                                    | 610        | 1.0000        | 308       | 1.0000        | 302          | 1.0000        | -             | -                      | -             |
| Coding           | 1 G*01:01:01:01                    | 126        | 0.2066        | 56        | 0.1818        | 70           | 0.2318        | 1.3578        | 0.9156 - 2.0135        | 0.1345        |
|                  | 2 G*01:01:02:01                    | 105        | 0.1721        | 46        | 0.1494        | 59           | 0.1954        | 1.3829        | 0.9057 - 2.1114        | 0.1350        |
|                  | 3 G*01:01:01:05                    | 72         | 0.1180        | 38        | 0.1234        | 34           | 0.1126        | 0.9014        | 0.5508 - 1.4752        | 0.7079        |
|                  | 4 G*01:03:01:02                    | 59         | 0.0967        | 32        | 0.1039        | 27           | 0.0894        | 0.8468        | 0.4941 - 1.4513        | 0.5852        |
|                  | 5 G*01:04:01                       | 43         | 0.0705        | 26        | 0.0844        | 17           | 0.0563        | 0.6470        | 0.3435 - 1.2185        | 0.2063        |
|                  | 6 G*01:01:01:04                    | 41         | 0.0672        | 19        | 0.0617        | 22           | 0.0728        | 1.1951        | 0.6330 - 2.2562        | 0.6296        |
|                  | 7 <b>G*01:04:04</b>                | <b>38</b>  | <b>0.0623</b> | <b>26</b> | <b>0.0844</b> | <b>12</b>    | <b>0.0397</b> | <b>0.4488</b> | <b>0.2221 - 0.9068</b> | <b>0.0285</b> |
|                  | 8 G*01:06                          | 32         | 0.0525        | 20        | 0.0649        | 12           | 0.0397        | 0.5959        | 0.2860 - 1.2414        | 0.2038        |
|                  | 9 G*01:05N                         | 27         | 0.0443        | 13        | 0.0422        | 14           | 0.0464        | 1.1031        | 0.5096 - 2.3876        | 0.8459        |
|                  | 10 G*01:01:03:03                   | 25         | 0.0410        | 13        | 0.0422        | 12           | 0.0397        | 0.9390        | 0.4214 - 2.0922        | 1.0000        |
|                  | 11 G*01:01:01:08                   | 12         | 0.0197        | 4         | 0.0130        | 8            | 0.0265        | 2.0680        | 0.6161 - 6.9413        | 0.2579        |
|                  | 12 G*01:01:22:01                   | 9          | 0.0148        | 4         | 0.0130        | 5            | 0.0166        | 1.2795        | 0.3403 - 4.8110        | 0.7499        |
|                  | 13 G*01:01:01:15                   | 4          | 0.0066        | 1         | 0.0032        | 3            | 0.0099        | 3.0803        | 0.3186 - 29.7784       | 0.3689        |
|                  | 14 G*01:01:17                      | 3          | 0.0049        | 1         | 0.0032        | 2            | 0.0066        | 2.0467        | 0.1846 - 22.6903       | 0.6207        |
|                  | 15 G*01:01:01:06                   | 2          | 0.0033        | 2         | 0.0065        | 0            | 0.0000        | 0.2026        | 0.0097 - 4.2385        | 0.4992        |
|                  | 16 G*01:01:15compatible            | 2          | 0.0033        | 0         | 0.0000        | 2            | 0.0066        | 5.1331        | 0.2454 - 107.3643      | 0.2447        |
|                  | 17 G*01:01:09(no deletion at +615) | 2          | 0.0033        | 2         | 0.0065        | 0            | 0.0000        | 0.2026        | 0.0097 - 4.2385        | 0.4992        |
|                  | 18 G*01:01:14                      | 2          | 0.0033        | 2         | 0.0065        | 0            | 0.0000        | 0.2026        | 0.0097 - 4.2385        | 0.4992        |
|                  | 19 G*01:01:01:13                   | 2          | 0.0033        | 0         | 0.0000        | 2            | 0.0066        | 5.1331        | 0.2454 - 107.3643      | 0.2447        |
|                  | 20 G*01:04:05compatible            | 1          | 0.0016        | 1         | 0.0032        | 0            | 0.0000        | 0.3388        | 0.0137 - 8.3505        | 1.0000        |
|                  | 21 G*01:01:30:02                   | 1          | 0.0016        | 1         | 0.0032        | 0            | 0.0000        | 0.3388        | 0.0137 - 8.3505        | 1.0000        |
|                  | 22 G*01:01:02:01(+2798G)           | 1          | 0.0016        | 0         | 0.0000        | 1            | 0.0033        | 3.0697        | 0.1246 - 75.6491       | 0.4951        |
|                  | 23 G*01:01:02:02                   | 1          | 0.0016        | 1         | 0.0032        | 0            | 0.0000        | 0.3388        | 0.0137 - 8.3505        | 1.0000        |
| Total [2n]       |                                    | 610        | 1.0000        | 308       | 1.0000        | 302          | 1.0000        | -             | -                      | -             |
| 3'UTR            | 1 UTR-02                           | 176        | 0.2885        | 83        | 0.2695        | 93           | 0.3079        | 1.2063        | 0.8494 - 1.7131        | 0.3257        |
|                  | 2 <b>UTR-01</b>                    | <b>140</b> | <b>0.2295</b> | <b>60</b> | <b>0.1948</b> | <b>80</b>    | <b>0.2649</b> | <b>1.4895</b> | <b>1.0180 - 2.1793</b> | <b>0.0433</b> |
|                  | 3 <b>UTR-03</b>                    | <b>81</b>  | <b>0.1328</b> | <b>53</b> | <b>0.1721</b> | <b>28</b>    | <b>0.0927</b> | <b>0.4917</b> | <b>0.3016 - 0.8015</b> | <b>0.0041</b> |
|                  | 4 UTR-04                           | 75         | 0.1230        | 41        | 0.1331        | 34           | 0.1126        | 0.8262        | 0.5086 - 1.3421        | 0.4615        |
|                  | 5 UTR-05                           | 53         | 0.0869        | 26        | 0.0844        | 27           | 0.0894        | 1.0649        | 0.6061 - 1.8710        | 0.8861        |
|                  | 6 UTR-06                           | 26         | 0.0426        | 10        | 0.0325        | 16           | 0.0530        | 1.6671        | 0.7442 - 3.7347        | 0.2337        |
|                  | 7 UTR-07                           | 26         | 0.0426        | 14        | 0.0455        | 12           | 0.0397        | 0.8690        | 0.3952 - 1.9107        | 0.8418        |
|                  | 8 UTR-18                           | 19         | 0.0311        | 9         | 0.0292        | 10           | 0.0331        | 1.1377        | 0.4557 - 2.8403        | 0.8195        |
|                  | 9 UTR-08                           | 4          | 0.0066        | 4         | 0.0130        | 0            | 0.0000        | 0.1118        | 0.0060 - 2.0864        | 0.1238        |
|                  | 10 UTR-20                          | 3          | 0.0049        | 2         | 0.0065        | 1            | 0.0033        | 0.5083        | 0.0458 - 5.6353        | 1.0000        |
|                  | 11 UTR-09                          | 3          | 0.0049        | 3         | 0.0097        | 0            | 0.0000        | 0.1443        | 0.0074 - 2.8050        | 0.2488        |
|                  | 12 UTR-17                          | 2          | 0.0033        | 2         | 0.0065        | 0            | 0.0000        | 0.2026        | 0.0097 - 4.2385        | 0.4992        |
|                  | 13 UTR-13                          | 1          | 0.0016        | 0         | 0.0000        | 1            | 0.0033        | 3.0697        | 0.1246 - 75.6491       | 0.4951        |
|                  | 14 UTR-44                          | 1          | 0.0016        | 1         | 0.0032        | 0            | 0.0000        | 0.3388        | 0.0137 - 8.3505        | 1.0000        |
| Total [2n]       |                                    | 610        | 1.0000        | 308       | 1.0000        | 302          | 1.0000        | -             | -                      | -             |

5'UTR: 5' upstream region. 3'UTR: 3' untranslated region. OR: Odds Ratio. CI: Confidence Interval. Freq: Frequency. Haplotypes in order of total frequency. Comparisons between PTC patients and controls were made using Fisher's exact test and *P*-values below 0.05 are highlighted in bold.

**Table S2.** Association between *HLA-G* 5'UTR, coding and 3'UTR haplotypes and histopathological features of PTC (*n* = 185).

| <i>HLA-G</i> haplotypes |                 | Tumor size      |                 | Histological Subtype $\phi$ |                | Tumor invasion  |                 | Extrathyroidal extension |                 | Multicentricity             |                            | Metastasis at diagnosis |                 | TNM Staging 8 <sup>th</sup> $\theta$ |                | Hashimoto's thyroiditis |                 | Response to therapy #       |                             |
|-------------------------|-----------------|-----------------|-----------------|-----------------------------|----------------|-----------------|-----------------|--------------------------|-----------------|-----------------------------|----------------------------|-------------------------|-----------------|--------------------------------------|----------------|-------------------------|-----------------|-----------------------------|-----------------------------|
|                         |                 | <2 cm           | ≥2 cm           | Low risk                    | High risk      | Absent          | Present         | Absent                   | Present         | Absent                      | Present                    | Absent                  | Present         | I                                    | II/III/IV      | Absent                  | Present         | Complete                    | Incomplete                  |
|                         |                 | <i>n</i> = 106  | <i>n</i> = 79   | <i>n</i> = 152              | <i>n</i> = 33  | <i>n</i> = 133  | <i>n</i> = 52   | <i>n</i> = 134           | <i>n</i> = 51   | <i>n</i> = 119              | <i>n</i> = 66              | <i>n</i> = 133          | <i>n</i> = 52   | <i>n</i> = 153                       | <i>n</i> = 30  | <i>n</i> = 132          | <i>n</i> = 53   | <i>n</i> = 111              | <i>n</i> = 29               |
|                         |                 | (freq.)         | (freq.)         | (freq.)                     | (freq.)        | (freq.)         | (freq.)         | (freq.)                  | (freq.)         | (freq.)                     | (freq.)                    | (freq.)                 | (freq.)         | (freq.)                              | (freq.)        | (freq.)                 | (freq.)         | (freq.)                     | (freq.)                     |
| 5'UTR                   | 1 G010102a      | 74<br>(0.3491)  | 48<br>(0.3038)  | 97<br>(0.3190)              | 25<br>(0.3787) | 87<br>(0.3271)  | 35<br>(0.3365)  | 92<br>(0.3433)           | 30<br>(0.2941)  | 71<br>(0.2983)              | 51<br>(0.3864)             | 82<br>(0.3083)          | 40<br>(0.3846)  | 99<br>(0.3235)                       | 21<br>(0.3500) | 86<br>(0.3257)          | 36<br>(0.3396)  | 74<br>(0.3333)              | 23<br>(0.3965)              |
|                         | 2 G010101a      | 50<br>(0.2358)  | 33<br>(0.2089)  | 66<br>(0.2171)              | 17<br>(0.2575) | 58<br>(0.2180)  | 25<br>(0.2404)  | 61<br>(0.2276)           | 22<br>(0.2157)  | 52<br>(0.2185)              | 31<br>(0.2348)             | 61<br>(0.2293)          | 22<br>(0.2115)  | 72<br>(0.2352)                       | 11<br>(0.1833) | 56<br>(0.2121)          | 27<br>(0.2547)  | 52<br>(0.2342)              | 9<br>(0.1551)               |
|                         | 3 G0104a        | 18<br>(0.0849)  | 23<br>(0.1456)  | 35<br>(0.1151)              | 6<br>(0.0909)  | 31<br>(0.1165)  | 10<br>(0.0962)  | 27<br>(0.1007)           | 14<br>(0.1373)  | 34 <sup>A</sup><br>(0.1429) | 7 <sup>A</sup><br>(0.0530) | 32<br>(0.1203)          | 9<br>(0.0865)   | 30<br>(0.0980)                       | 9<br>(0.1500)  | 32<br>(0.1212)          | 9<br>(0.0849)   | 19<br>(0.0855)              | 7<br>(0.1206)               |
|                         | 4 G010101f      | 15<br>(0.0708)  | 12<br>(0.0759)  | 23<br>(0.0756)              | 4<br>(0.0606)  | 17<br>(0.0639)  | 10<br>(0.0962)  | 19<br>(0.0709)           | 8<br>(0.0784)   | 17<br>(0.0714)              | 10<br>(0.0758)             | 19<br>(0.0714)          | 8<br>(0.0769)   | 21<br>(0.0686)                       | 6<br>(0.1000)  | 20<br>(0.0757)          | 7<br>(0.0660)   | 18<br>(0.0810)              | 4<br>(0.0689)               |
|                         | 5 G010101b      | 12<br>(0.0566)  | 10<br>(0.0633)  | 17<br>(0.0559)              | 5<br>(0.0757)  | 16<br>(0.0602)  | 6<br>(0.0577)   | 17<br>(0.0634)           | 5<br>(0.0490)   | 12<br>(0.0504)              | 10<br>(0.0758)             | 19<br>(0.0714)          | 3<br>(0.0288)   | 21<br>(0.0686)                       | 1<br>(0.0166)  | 18<br>(0.0681)          | 4<br>(0.0377)   | 16<br>(0.0720)              | 3<br>(0.0517)               |
|                         | 6 G0103a        | 14<br>(0.0660)  | 4<br>(0.0253)   | 15<br>(0.0493)              | 3<br>(0.0454)  | 13<br>(0.0489)  | 5<br>(0.0481)   | 13<br>(0.0485)           | 5<br>(0.0490)   | 13<br>(0.0546)              | 5<br>(0.0379)              | 14<br>(0.0526)          | 4<br>(0.0385)   | 13<br>(0.0424)                       | 5<br>(0.0833)  | 9<br>(0.0340)           | 9<br>(0.0849)   | 10<br>(0.0450)              | 3<br>(0.0517)               |
|                         | 7 G010101c      | 8<br>(0.0377)   | 9<br>(0.0570)   | 13<br>(0.0427)              | 4<br>(0.0606)  | 15<br>(0.0564)  | 2<br>(0.0192)   | 15<br>(0.0560)           | 2<br>(0.0196)   | 13<br>(0.0546)              | 4<br>(0.0303)              | 11<br>(0.0414)          | 6<br>(0.0577)   | 15<br>(0.0490)                       | 2<br>(0.0333)  | 10<br>(0.0378)          | 7<br>(0.0660)   | 13<br>(0.0585)              | 2<br>(0.0344)               |
|                         | 8 G010101d      | 8<br>(0.0377)   | 5<br>(0.0316)   | 12<br>(0.0394)              | 1<br>(0.0151)  | 8<br>(0.0301)   | 5<br>(0.0481)   | 8<br>(0.0299)            | 5<br>(0.0490)   | 9<br>(0.0378)               | 4<br>(0.0303)              | 8<br>(0.0301)           | 5<br>(0.0481)   | 10<br>(0.0326)                       | 3<br>(0.0500)  | 12<br>(0.0454)          | 1<br>(0.0094)   | 8<br>(0.0360)               | 2<br>(0.0344)               |
|                         | 9 G0103e        | 6<br>(0.0283)   | 4<br>(0.0253)   | 10<br>(0.0328)              | 0<br>(0.0000)  | 7<br>(0.0263)   | 3<br>(0.0288)   | 5<br>(0.0187)            | 5<br>(0.0490)   | 9<br>(0.0378)               | 1<br>(0.0076)              | 7<br>(0.0263)           | 3<br>(0.0288)   | 8<br>(0.0261)                        | 2<br>(0.0333)  | 9<br>(0.0340)           | 1<br>(0.0094)   | 6<br>(0.0270)               | 0<br>(0.0000)               |
|                         | 10 G0103d       | 3<br>(0.0142)   | 4<br>(0.0253)   | 6<br>(0.0197)               | 1<br>(0.0151)  | 7<br>(0.0263)   | 0<br>(0.0000)   | 6<br>(0.0224)            | 1<br>(0.0098)   | 3<br>(0.0126)               | 4<br>(0.0303)              | 6<br>(0.0226)           | 1<br>(0.0096)   | 7<br>(0.0228)                        | 0<br>(0.0000)  | 7<br>(0.0265)           | 0<br>(0.0000)   | 4<br>(0.0180)               | 3<br>(0.0517)               |
|                         | 11 G0104b       | 3<br>(0.0142)   | 2<br>(0.0127)   | 5<br>(0.0164)               | 0<br>(0.0000)  | 3<br>(0.0113)   | 2<br>(0.0192)   | 3<br>(0.0112)            | 2<br>(0.0196)   | 3<br>(0.0126)               | 2<br>(0.0152)              | 3<br>(0.0113)           | 2<br>(0.0192)   | 5<br>(0.0163)                        | 0<br>(0.0000)  | 2<br>(0.0075)           | 3<br>(0.0283)   | 0<br>(0.0000)               | 1<br>(0.0172)               |
|                         | 12 G010102d     | 0<br>(0.0000)   | 2<br>(0.0127)   | 2<br>(0.0065)               | 0<br>(0.0000)  | 1<br>(0.0038)   | 1<br>(0.0096)   | 1<br>(0.0037)            | 1<br>(0.0098)   | 1<br>(0.0042)               | 1<br>(0.0076)              | 1<br>(0.0038)           | 1<br>(0.0096)   | 2<br>(0.0065)                        | 0<br>(0.0000)  | 1<br>(0.0037)           | 1<br>(0.0094)   | 0<br>(0.0000)               | 1<br>(0.0172)               |
|                         | 13 G010101g     | 1<br>(0.0047)   | 0<br>(0.0000)   | 1<br>(0.0032)               | 0<br>(0.0000)  | 1<br>(0.0038)   | 0<br>(0.0000)   | 1<br>(0.0037)            | 0<br>(0.0000)   | 0<br>(0.0000)               | 1<br>(0.0076)              | 1<br>(0.0038)           | 0<br>(0.0000)   | 1<br>(0.0032)                        | 0<br>(0.0000)  | 0<br>(0.0000)           | 1<br>(0.0094)   | 1<br>(0.0045)               | 0<br>(0.0000)               |
|                         | 14 G010101j     | 0<br>(0.0000)   | 1<br>(0.0063)   | 1<br>(0.0032)               | 0<br>(0.0000)  | 1<br>(0.0038)   | 0<br>(0.0000)   | 0<br>(0.0000)            | 1<br>(0.0098)   | 1<br>(0.0042)               | 0<br>(0.0000)              | 1<br>(0.0038)           | 0<br>(0.0000)   | 1<br>(0.0032)                        | 0<br>(0.0000)  | 1<br>(0.0037)           | 0<br>(0.0000)   | 0<br>(0.0045)               | 0<br>(0.0000)               |
|                         | 15 G010101h     | 0<br>(0.0000)   | 1<br>(0.0063)   | 1<br>(0.0032)               | 0<br>(0.0000)  | 1<br>(0.0038)   | 0<br>(0.0000)   | 0<br>(0.0000)            | 1<br>(0.0098)   | 0<br>(0.0000)               | 1<br>(0.0076)              | 1<br>(0.0038)           | 0<br>(0.0000)   | 1<br>(0.0032)                        | 0<br>(0.0000)  | 1<br>(0.0037)           | 0<br>(0.0000)   | 0<br>(0.0000)               | 0<br>(0.0000)               |
| Total [2n]              |                 | 212<br>(1.0000) | 158<br>(1.0000) | 304<br>(1.0000)             | 66<br>(1.0000) | 266<br>(1.0000) | 104<br>(1.0000) | 268<br>(1.0000)          | 102<br>(1.0000) | 238<br>(1.0000)             | 132<br>(1.0000)            | 266<br>(1.0000)         | 104<br>(1.0000) | 306<br>(1.0000)                      | 60<br>(1.0000) | 264<br>(1.0000)         | 106<br>(1.0000) | 222<br>(1.0000)             | 58<br>(1.0000)              |
| Coding                  | 1 G*01:01:01:01 | 50<br>(0.2358)  | 33<br>(0.2089)  | 66<br>(0.2163)              | 17<br>(0.2575) | 58<br>(0.2180)  | 25<br>(0.2404)  | 61<br>(0.2276)           | 22<br>(0.2157)  | 53<br>(0.2227)              | 30<br>(0.2273)             | 62<br>(0.2331)          | 21<br>(0.2019)  | 72<br>(0.2352)                       | 11<br>(0.1833) | 55<br>(0.2083)          | 28<br>(0.2641)  | 53<br>(0.2387)              | 9<br>(0.1551)               |
|                         | 2 G*01:01:02:01 | 39<br>(0.1840)  | 31<br>(0.1962)  | 57<br>(0.1868)              | 13<br>(0.1969) | 50<br>(0.1880)  | 20<br>(0.1923)  | 52<br>(0.1940)           | 18<br>(0.1765)  | 41<br>(0.1723)              | 29<br>(0.2197)             | 48<br>(0.1805)          | 22<br>(0.2115)  | 56<br>(0.1830)                       | 13<br>(0.2166) | 54<br>(0.2045)          | 16<br>(0.1509)  | 37 <sup>B</sup><br>(0.1666) | 17 <sup>B</sup><br>(0.2931) |
|                         | 3 G*01:01:01:05 | 19<br>(0.0896)  | 18<br>(0.1139)  | 29<br>(0.0950)              | 8<br>(0.1212)  | 29<br>(0.1090)  | 8<br>(0.0769)   | 31<br>(0.1157)           | 6<br>(0.0588)   | 24<br>(0.1008)              | 13<br>(0.0985)             | 28<br>(0.1053)          | 9<br>(0.0865)   | 34<br>(0.1111)                       | 3<br>(0.0500)  | 26<br>(0.0984)          | 11<br>(0.1037)  | 27<br>(0.1216)              | 5<br>(0.0862)               |
|                         | 4 G*01:03:01:02 | 23<br>(0.1085)  | 12<br>(0.0759)  | 31<br>(0.1016)              | 4<br>(0.0606)  | 27<br>(0.1015)  | 8<br>(0.0769)   | 24<br>(0.0896)           | 11<br>(0.1078)  | 25<br>(0.1050)              | 10<br>(0.0758)             | 27<br>(0.1015)          | 8<br>(0.0769)   | 28<br>(0.0915)                       | 7<br>(0.1166)  | 25<br>(0.0946)          | 10<br>(0.0943)  | 20<br>(0.0900)              | 6<br>(0.1034)               |
|                         | 5 G*01:04:01    | 13<br>(0.0613)  | 14<br>(0.0886)  | 23<br>(0.0754)              | 4<br>(0.0606)  | 19<br>(0.0714)  | 8<br>(0.0769)   | 18<br>(0.0672)           | 9<br>(0.0882)   | 22<br>(0.0924)              | 5<br>(0.0379)              | 22<br>(0.0827)          | 5<br>(0.0481)   | 22<br>(0.0718)                       | 5<br>(0.0833)  | 18<br>(0.0681)          | 9<br>(0.0849)   | 9 <sup>C</sup><br>(0.0405)  | 7 <sup>C</sup><br>(0.1206)  |
|                         | 6 G*01:01:01:04 | 15<br>(0.0708)  | 11<br>(0.0696)  | 24<br>(0.0786)              | 2<br>(0.0303)  | 16<br>(0.0602)  | 10<br>(0.0962)  | 17<br>(0.0634)           | 9<br>(0.0882)   | 15<br>(0.0630)              | 11<br>(0.0833)             | 18<br>(0.0677)          | 8<br>(0.0769)   | 21<br>(0.0686)                       | 5<br>(0.0833)  | 21<br>(0.0795)          | 5<br>(0.0471)   | 17<br>(0.0765)              | 4<br>(0.0689)               |
|                         | 7 G*01:04:04    | 8<br>(0.0377)   | 11<br>(0.0696)  | 17<br>(0.0557)              | 2<br>(0.0303)  | 15<br>(0.0564)  | 4<br>(0.0385)   | 12<br>(0.0448)           | 7<br>(0.0686)   | 15<br>(0.0630)              | 4<br>(0.0833)              | 13<br>(0.0489)          | 6<br>(0.0577)   | 13<br>(0.0424)                       | 4<br>(0.0666)  | 16<br>(0.0606)          | 3<br>(0.0283)   | 10<br>(0.0450)              | 1<br>(0.0172)               |
|                         | 8 G*01:05N      | 10<br>(0.0472)  | 6<br>(0.0380)   | 14<br>(0.0459)              | 2<br>(0.0303)  | 12<br>(0.0451)  | 4<br>(0.0385)   | 12<br>(0.0448)           | 4<br>(0.0392)   | 10<br>(0.0420)              | 6<br>(0.0455)              | 12<br>(0.0451)          | 4<br>(0.0385)   | 15<br>(0.0490)                       | 1<br>(0.0166)  | 11<br>(0.0416)          | 5<br>(0.0471)   | 11<br>(0.0495)              | 2<br>(0.0344)               |
|                         | 9 G*01:06       | 11<br>(0.0519)  | 4<br>(0.0253)   | 11<br>(0.0393)              | 4<br>(0.0606)  | 12<br>(0.0451)  | 3<br>(0.0288)   | 11<br>(0.0410)           | 4<br>(0.0392)   | 8<br>(0.0336)               | 7<br>(0.0530)              | 11<br>(0.0414)          | 4<br>(0.0385)   | 14<br>(0.0457)                       | 1<br>(0.0166)  | 9<br>(0.0340)           | 6<br>(0.0566)   | 10<br>(0.0450)              | 1<br>(0.0172)               |

|       |            |                                   |                 |                 |                 |                |                 |                 |                 |                 |                                          |                                          |                 |                 |                 |                |                 |                 |                 |                |
|-------|------------|-----------------------------------|-----------------|-----------------|-----------------|----------------|-----------------|-----------------|-----------------|-----------------|------------------------------------------|------------------------------------------|-----------------|-----------------|-----------------|----------------|-----------------|-----------------|-----------------|----------------|
| 3'UTR | 10         | G*01:01:03:03                     | 8<br>(0.0377)   | 6<br>(0.0380)   | 11<br>(0.0393)  | 3<br>(0.0454)  | 10<br>(0.0376)  | 4<br>(0.0385)   | 11<br>(0.0410)  | 3<br>(0.0294)   | 10<br>(0.0420)                           | 4<br>(0.0833)                            | 8<br>(0.0301)   | 6<br>(0.0577)   | 11<br>(0.0359)  | 3<br>(0.0500)  | 12<br>(0.0454)  | 2<br>(0.0188)   | 10<br>(0.0450)  | 2<br>(0.0344)  |
|       | 11         | G*01:01:01:08                     | 6<br>(0.0283)   | 3<br>(0.0190)   | 9<br>(0.0295)   | 0<br>(0.0000)  | 5<br>(0.0188)   | 4<br>(0.0385)   | 6<br>(0.0224)   | 3<br>(0.0294)   | 6<br>(0.0252)                            | 3<br>(0.0227)                            | 6<br>(0.0226)   | 3<br>(0.0288)   | 8<br>(0.0261)   | 1<br>(0.0166)  | 9<br>(0.0340)   | 0<br>(0.0000)   | 6<br>(0.0270)   | 1<br>(0.0172)  |
|       | 12         | G*01:01:22:01                     | 6<br>(0.0283)   | 1<br>(0.0063)   | 6<br>(0.0196)   | 1<br>(0.0151)  | 5<br>(0.0188)   | 2<br>(0.0192)   | 5<br>(0.0187)   | 2<br>(0.0196)   | 1<br>(0.0042)                            | 6<br>(0.0455)                            | 4<br>(0.0150)   | 3<br>(0.0288)   | 6<br>(0.0196)   | 0<br>(0.0000)  | 2<br>(0.0075)   | 5<br>(0.0471)   | 3<br>(0.0135)   | 2<br>(0.0344)  |
|       | 13         | G*01:01:01:15                     | 2<br>(0.0094)   | 2<br>(0.0127)   | 3<br>(0.0098)   | 1<br>(0.0151)  | 3<br>(0.0113)   | 1<br>(0.0096)   | 2<br>(0.0075)   | 2<br>(0.0196)   | 3<br>(0.0126)                            | 1<br>(0.0076)                            | 2<br>(0.0075)   | 2<br>(0.0192)   | 2<br>(0.0065)   | 2<br>(0.0333)  | 3<br>(0.0113)   | 1<br>(0.0094)   | 2<br>(0.0090)   | 1<br>(0.0172)  |
|       | 14         | G*01:01:15<br>compatible          | 1<br>(0.0047)   | 1<br>(0.0063)   | 1<br>(0.0032)   | 1<br>(0.0151)  | 2<br>(0.0075)   | 0<br>(0.0000)   | 1<br>(0.0037)   | 1<br>(0.0098)   | 1<br>(0.0042)                            | 1<br>(0.0076)                            | 2<br>(0.0075)   | 0<br>(0.0000)   | 2<br>(0.0065)   | 0<br>(0.0000)  | 2<br>(0.0075)   | 0<br>(0.0000)   | 2<br>(0.0090)   | 0<br>(0.0000)  |
|       | 15         | G*01:01:01:13                     | 1<br>(0.0047)   | 1<br>(0.0063)   | 0<br>(0.0000)   | 2<br>(0.0303)  | 2<br>(0.0075)   | 0<br>(0.0000)   | 2<br>(0.0075)   | 0<br>(0.0000)   | 2<br>(0.0084)                            | 0<br>(0.0000)                            | 2<br>(0.0075)   | 0<br>(0.0000)   | 1<br>(0.0032)   | 1<br>(0.0166)  | 0<br>(0.0000)   | 2<br>(0.0188)   | 2<br>(0.0090)   | 0<br>(0.0000)  |
|       | 16         | G*01:01:17                        | 0<br>(0.0000)   | 2<br>(0.0127)   | 1<br>(0.0032)   | 1<br>(0.0151)  | 0<br>(0.0000)   | 2<br>(0.0192)   | 2<br>(0.0075)   | 0<br>(0.0000)   | 1<br>(0.0042)                            | 1<br>(0.0076)                            | 0<br>(0.0000)   | 2<br>(0.0192)   | 2<br>(0.0000)   | 0<br>(0.0333)  | 2<br>(0.0000)   | 2<br>(0.0188)   | 2<br>(0.0090)   | 0<br>(0.0000)  |
|       | 17         | G*01:01:01:06                     | 0<br>(0.0000)   | 1<br>(0.0063)   | 1<br>(0.0032)   | 0<br>(0.0000)  | 1<br>(0.0038)   | 0<br>(0.0000)   | 0<br>(0.0000)   | 1<br>(0.0098)   | 0<br>(0.0000)                            | 1<br>(0.0076)                            | 1<br>(0.0038)   | 0<br>(0.0000)   | 1<br>(0.0032)   | 0<br>(0.0000)  | 1<br>(0.0037)   | 0<br>(0.0000)   | 0<br>(0.0000)   | 0<br>(0.0000)  |
|       | 18         | G*01:01:02:01 <sup>(+2798C)</sup> | 0<br>(0.0000)   | 1<br>(0.0063)   | 0<br>(0.0000)   | 1<br>(0.0151)  | 0<br>(0.0000)   | 1<br>(0.0096)   | 1<br>(0.0037)   | 0<br>(0.0000)   | 1<br>(0.0042)                            | 0<br>(0.0000)                            | 0<br>(0.0000)   | 1<br>(0.0096)   | 1<br>(0.0000)   | 0<br>(0.0166)  | 0<br>(0.0000)   | 1<br>(0.0094)   | 1<br>(0.0045)   | 0<br>(0.0000)  |
|       | Total [2n] |                                   | 212<br>(1.0000) | 158<br>(1.0000) | 304<br>(1.0000) | 66<br>(1.0000) | 266<br>(1.0000) | 104<br>(1.0000) | 268<br>(1.0000) | 102<br>(1.0000) | 238<br>(1.0000)                          | 132<br>(1.0000)                          | 266<br>(1.0000) | 104<br>(1.0000) | 306<br>(1.0000) | 60<br>(1.0000) | 264<br>(1.0000) | 106<br>(1.0000) | 222<br>(1.0000) | 58<br>(1.0000) |
| 3'UTR | 1          | UTR-02                            | 66<br>(0.3113)  | 45<br>(0.2848)  | 89<br>(0.2927)  | 22<br>(0.3333) | 79<br>(0.2970)  | 32<br>(0.3077)  | 83<br>(0.3097)  | 28<br>(0.2745)  | <b>62<sup>Ⓛ</sup></b><br><b>(0.2605)</b> | <b>49<sup>Ⓛ</sup></b><br><b>(0.3712)</b> | 75<br>(0.2820)  | 36<br>(0.3462)  | 91<br>(0.2973)  | 18<br>(0.3000) | 76<br>(0.2878)  | 35<br>(0.3301)  | 64<br>(0.2882)  | 22<br>(0.3793) |
|       | 2          | UTR-01                            | 56<br>(0.2642)  | 38<br>(0.2405)  | 77<br>(0.2532)  | 17<br>(0.2575) | 66<br>(0.2481)  | 28<br>(0.2692)  | 67<br>(0.2500)  | 27<br>(0.2647)  | 63<br>(0.2348)                           | 31<br>(0.2594)                           | 69<br>(0.2404)  | 25<br>(0.2614)  | 80<br>(0.2333)  | 14<br>(0.2462) | 65<br>(0.2735)  | 29<br>(0.2702)  | 60<br>(0.1896)  | 11<br>(0.1896) |
|       | 3          | UTR-03                            | 21<br>(0.0991)  | 24<br>(0.1519)  | 39<br>(0.1282)  | 6<br>(0.0909)  | 34<br>(0.1278)  | 11<br>(0.1058)  | 30<br>(0.1119)  | 15<br>(0.1471)  | <b>36<sup>Ⓛ</sup></b><br><b>(0.1513)</b> | <b>9<sup>Ⓛ</sup></b><br><b>(0.0682)</b>  | 35<br>(0.1316)  | 10<br>(0.0962)  | 35<br>(0.1143)  | 8<br>(0.1333)  | 34<br>(0.1287)  | 11<br>(0.1037)  | 19<br>(0.0855)  | 7<br>(0.1206)  |
|       | 4          | UTR-04                            | 19<br>(0.0896)  | 19<br>(0.1203)  | 29<br>(0.0953)  | 9<br>(0.1363)  | 29<br>(0.1090)  | 9<br>(0.0865)   | 31<br>(0.1157)  | 7<br>(0.0686)   | 23<br>(0.0966)                           | 15<br>(0.1136)                           | 29<br>(0.1090)  | 9<br>(0.0865)   | 35<br>(0.1143)  | 3<br>(0.0500)  | 27<br>(0.1022)  | 11<br>(0.1037)  | 27<br>(0.1216)  | 5<br>(0.0862)  |
|       | 5          | UTR-05                            | 23<br>(0.1085)  | 12<br>(0.0759)  | 31<br>(0.1019)  | 4<br>(0.0606)  | 27<br>(0.1015)  | 8<br>(0.0769)   | 24<br>(0.0896)  | 11<br>(0.1078)  | 25<br>(0.1050)                           | 10<br>(0.0758)                           | 27<br>(0.1015)  | 8<br>(0.0769)   | 28<br>(0.0915)  | 7<br>(0.1166)  | 25<br>(0.0946)  | 10<br>(0.0943)  | 20<br>(0.0900)  | 6<br>(0.1034)  |
|       | 6          | UTR-06                            | 11<br>(0.0519)  | 7<br>(0.0443)   | 14<br>(0.0460)  | 4<br>(0.0606)  | 12<br>(0.0451)  | 6<br>(0.0577)   | 14<br>(0.0522)  | 4<br>(0.0392)   | 10<br>(0.0420)                           | 8<br>(0.0606)                            | 13<br>(0.0489)  | 5<br>(0.0481)   | 16<br>(0.0522)  | 2<br>(0.0333)  | 15<br>(0.0568)  | 3<br>(0.0283)   | 13<br>(0.0585)  | 2<br>(0.0344)  |
|       | 7          | UTR-07                            | 8<br>(0.0377)   | 6<br>(0.0380)   | 11<br>(0.0361)  | 3<br>(0.0454)  | 10<br>(0.0376)  | 4<br>(0.0385)   | 11<br>(0.0410)  | 3<br>(0.0294)   | 10<br>(0.0420)                           | 4<br>(0.0303)                            | 8<br>(0.0301)   | 6<br>(0.0577)   | 11<br>(0.0359)  | 3<br>(0.0500)  | 12<br>(0.0454)  | 2<br>(0.0188)   | 10<br>(0.0450)  | 2<br>(0.0344)  |
|       | 8          | UTR-18                            | 7<br>(0.0330)   | 5<br>(0.0316)   | 11<br>(0.0361)  | 1<br>(0.0151)  | 8<br>(0.0301)   | 4<br>(0.0385)   | 8<br>(0.0299)   | 4<br>(0.0392)   | 6<br>(0.0252)                            | 6<br>(0.0455)                            | 8<br>(0.0301)   | 4<br>(0.0385)   | 8<br>(0.0261)   | 4<br>(0.0666)  | 8<br>(0.0303)   | 4<br>(0.0377)   | 9<br>(0.0405)   | 1<br>(0.0172)  |
|       | 9          | UTR-20                            | 1<br>(0.0047)   | 1<br>(0.0063)   | 2<br>(0.0065)   | 0<br>(0.0000)  | 1<br>(0.0038)   | 1<br>(0.0096)   | 0<br>(0.0000)   | 2<br>(0.0196)   | 2<br>(0.0084)                            | 0<br>(0.0000)                            | 2<br>(0.0075)   | 0<br>(0.0000)   | 2<br>(0.0065)   | 0<br>(0.0000)  | 2<br>(0.0075)   | 0<br>(0.0000)   | 0<br>(0.0000)   | 1<br>(0.0172)  |
|       | 10         | UTR-13                            | 0<br>(0.0000)   | 1<br>(0.0063)   | 1<br>(0.0032)   | 0<br>(0.0000)  | 0<br>(0.0000)   | 1<br>(0.0096)   | 0<br>(0.0000)   | 1<br>(0.0098)   | 1<br>(0.0042)                            | 0<br>(0.0000)                            | 0<br>(0.0000)   | 1<br>(0.0096)   | 0<br>(0.0000)   | 1<br>(0.0166)  | 0<br>(0.0000)   | 1<br>(0.0094)   | 0<br>(0.0000)   | 1<br>(0.0172)  |
|       | Total [2n] |                                   | 212<br>(1.0000) | 158<br>(1.0000) | 304<br>(1.0000) | 66<br>(1.0000) | 266<br>(1.0000) | 104<br>(1.0000) | 268<br>(1.0000) | 102<br>(1.0000) | 238<br>(1.0000)                          | 132<br>(1.0000)                          | 266<br>(1.0000) | 104<br>(1.0000) | 306<br>(1.0000) | 60<br>(1.0000) | 264<br>(1.0000) | 106<br>(1.0000) | 222<br>(1.0000) | 58<br>(1.0000) |

5'URR: 5' upstream region. 3'UTR: 3' untranslated region. Freq: Frequency. Haplotypes in order of total frequency. Association of haplotypes with histopathological features of PTC was made by using Fisher's exact test and P-values below 0.05 are highlighted in bold. <sup>Ⓛ</sup> Low-risk/more frequent subtypes (Classic + Follicular) or high-risk/less frequent subtypes (Oncocytic, solid, trabecular and others). <sup>Ⓢ</sup> Information not available for 2 PTC patients (total *n* = 183). Tumor node metastasis (TNM) system refers to the primary tumor, lymph node metastasis and distant metastasis. <sup>Ⓢ</sup> Information not available for 45 PTC patients (total *n* = 140). Complete (the sum of patients presenting excellent and indeterminate responses) or incomplete (the sum of patients presenting biochemical and structural incomplete responses).

<sup>Ⓐ</sup> OR: 0.3360; 95% CI: 0.1446-0.7810; *P*: 0.0089.

<sup>Ⓑ</sup> OR: 2.0732; 95% CI: 1.0646-4.0374; *P*: 0.0392.

<sup>Ⓒ</sup> OR: 3.2484; 95% CI: 1.1552-9.1345; *P*: 0.0279.

<sup>Ⓓ</sup> OR: 1.6759; 95% CI: 1.0616-2.6456; *P*: 0.0328.

<sup>Ⓔ</sup> OR: 0.4106; 95% CI: 0.1912-0.8815; *P*: 0.0200.

OR: Odds ratio. CI: Confidence interval.

**Table S3.** Association between *HLA-G* extended haplotypes and histopathological features of PTC (*n* = 185) (Continuation of **Table 2**).

| HLA-G extended haplotypes |          |                         |                     | Tumor size          |                     | Histological Subtype $\phi$ |                     | Tumor invasion      |                     | Extrathyroidal extension |                     | Multicentricity     |                     | Metastasis at diagnosis |                     | TNM Staging 8 <sup>th</sup> $\theta$ |                     | Hashimoto's thyroiditis |                     | Response to therapy # |                |
|---------------------------|----------|-------------------------|---------------------|---------------------|---------------------|-----------------------------|---------------------|---------------------|---------------------|--------------------------|---------------------|---------------------|---------------------|-------------------------|---------------------|--------------------------------------|---------------------|-------------------------|---------------------|-----------------------|----------------|
| 5'URR                     | Coding   | 3'UTR                   | <2 cm               | $\geq$ 2 cm         | Low risk            | High risk                   | Absent              | Present             | Absent              | Present                  | Absent              | Present             | Absent              | Present                 | I                   | II/III/IV                            | Absent              | Present                 | Complete            | Incomplete            |                |
|                           |          |                         | <i>n</i> = 106      | <i>n</i> = 79       | <i>n</i> = 152      | <i>n</i> = 33               | <i>n</i> = 133      | <i>n</i> = 52       | <i>n</i> = 134      | <i>n</i> = 51            | <i>n</i> = 119      | <i>n</i> = 66       | <i>n</i> = 133      | <i>n</i> = 52           | <i>n</i> = 153      | <i>n</i> = 30                        | <i>n</i> = 132      | <i>n</i> = 53           | <i>n</i> = 111      | <i>n</i> = 29         |                |
|                           |          |                         | <i>n</i><br>(freq.) | <i>n</i><br>(freq.) | <i>n</i><br>(freq.) | <i>n</i><br>(freq.)         | <i>n</i><br>(freq.) | <i>n</i><br>(freq.) | <i>n</i><br>(freq.) | <i>n</i><br>(freq.)      | <i>n</i><br>(freq.) | <i>n</i><br>(freq.) | <i>n</i><br>(freq.) | <i>n</i><br>(freq.)     | <i>n</i><br>(freq.) | <i>n</i><br>(freq.)                  | <i>n</i><br>(freq.) | <i>n</i><br>(freq.)     | <i>n</i><br>(freq.) | <i>n</i><br>(freq.)   |                |
| 18                        | G010101d | 01:01:01:15             | UTR-01              | 2<br>(0.0094)       | 2<br>(0.0127)       | 3<br>(0.0098)               | 1<br>(0.0151)       | 3<br>(0.0113)       | 1<br>(0.0096)       | 2<br>(0.0075)            | 2<br>(0.0196)       | 3<br>(0.0126)       | 1<br>(0.0076)       | 2<br>(0.0075)           | 2<br>(0.0192)       | 2<br>(0.0065)                        | 2<br>(0.0333)       | 3<br>(0.0113)           | 1<br>(0.0094)       | 2<br>(0.0090)         | 1<br>(0.0172)  |
| 19                        | G010101f | 01:01:01:04             | UTR-20              | 1<br>(0.0047)       | 1<br>(0.0063)       | 2<br>(0.0065)               | 0<br>(0.0000)       | 1<br>(0.0038)       | 1<br>(0.0096)       | 0<br>(0.0000)            | 2<br>(0.0196)       | 2<br>(0.0084)       | 0<br>(0.0000)       | 2<br>(0.0075)           | 0<br>(0.0000)       | 2<br>(0.0065)                        | 0<br>(0.0000)       | 2<br>(0.0075)           | 0<br>(0.0000)       | 0<br>(0.0000)         | 1<br>(0.0172)  |
| 20                        | G010101a | 01:01:01:01             | UTR-06              | 2<br>(0.0094)       | 0<br>(0.0000)       | 2<br>(0.0065)               | 0<br>(0.0000)       | 1<br>(0.0038)       | 1<br>(0.0096)       | 2<br>(0.0075)            | 0<br>(0.0000)       | 0<br>(0.0000)       | 2<br>(0.0152)       | 1<br>(0.0038)           | 1<br>(0.0096)       | 2<br>(0.0065)                        | 0<br>(0.0000)       | 2<br>(0.0075)           | 0<br>(0.0000)       | 1<br>(0.0045)         | 0<br>(0.0000)  |
| 21                        | G010102d | 01:01:02:01             | UTR-02              | 0<br>(0.0000)       | 2<br>(0.0127)       | 2<br>(0.0065)               | 0<br>(0.0000)       | 1<br>(0.0038)       | 1<br>(0.0096)       | 1<br>(0.0037)            | 1<br>(0.0098)       | 1<br>(0.0042)       | 1<br>(0.0076)       | 1<br>(0.0038)           | 1<br>(0.0096)       | 2<br>(0.0065)                        | 0<br>(0.0000)       | 1<br>(0.0037)           | 1<br>(0.0094)       | 0<br>(0.0000)         | 1<br>(0.0172)  |
| 22                        | G010102a | 01:01:17                | UTR-02              | 0<br>(0.0000)       | 2<br>(0.0127)       | 1<br>(0.0032)               | 1<br>(0.0151)       | 0<br>(0.0000)       | 2<br>(0.0192)       | 2<br>(0.0075)            | 0<br>(0.0000)       | 1<br>(0.0042)       | 1<br>(0.0076)       | 0<br>(0.0000)           | 2<br>(0.0192)       | 0<br>(0.0000)                        | 2<br>(0.0333)       | 0<br>(0.0000)           | 2<br>(0.0188)       | 2<br>(0.0090)         | 0<br>(0.0000)  |
| 23                        | G010101b | 01:01:15<br>compatible  | UTR-06              | 1<br>(0.0047)       | 1<br>(0.0063)       | 1<br>(0.0032)               | 1<br>(0.0151)       | 2<br>(0.0075)       | 0<br>(0.0000)       | 1<br>(0.0037)            | 1<br>(0.0098)       | 1<br>(0.0042)       | 1<br>(0.0076)       | 2<br>(0.0075)           | 0<br>(0.0000)       | 2<br>(0.0065)                        | 0<br>(0.0000)       | 2<br>(0.0075)           | 0<br>(0.0000)       | 2<br>(0.0090)         | 0<br>(0.0000)  |
| 24                        | G010101f | 01:01:01:13             | UTR-06              | 1<br>(0.0047)       | 1<br>(0.0063)       | 0<br>(0.0000)               | 2<br>(0.0303)       | 2<br>(0.0075)       | 0<br>(0.0000)       | 2<br>(0.0075)            | 0<br>(0.0000)       | 2<br>(0.0084)       | 0<br>(0.0000)       | 2<br>(0.0075)           | 0<br>(0.0000)       | 1<br>(0.0032)                        | 1<br>(0.0166)       | 0<br>(0.0000)           | 2<br>(0.0188)       | 2<br>(0.0090)         | 0<br>(0.0000)  |
| 25                        | G0104a   | 01:04:01                | UTR-13              | 0<br>(0.0000)       | 1<br>(0.0063)       | 1<br>(0.0032)               | 0<br>(0.0000)       | 0<br>(0.0000)       | 1<br>(0.0096)       | 0<br>(0.0000)            | 1<br>(0.0098)       | 1<br>(0.0042)       | 0<br>(0.0000)       | 0<br>(0.0000)           | 1<br>(0.0096)       | 0<br>(0.0000)                        | 1<br>(0.0166)       | 0<br>(0.0000)           | 1<br>(0.0094)       | 0<br>(0.0000)         | 1<br>(0.0172)  |
| 26                        | G010101g | 01:01:01:01             | UTR-01              | 1<br>(0.0047)       | 0<br>(0.0000)       | 1<br>(0.0032)               | 0<br>(0.0000)       | 1<br>(0.0038)       | 0<br>(0.0000)       | 1<br>(0.0037)            | 0<br>(0.0000)       | 0<br>(0.0000)       | 1<br>(0.0076)       | 1<br>(0.0038)           | 0<br>(0.0000)       | 1<br>(0.0032)                        | 0<br>(0.0000)       | 0<br>(0.0000)           | 1<br>(0.0094)       | 1<br>(0.0045)         | 0<br>(0.0000)  |
| 27                        | G010102a | 01:01:02:01<br>(+2798G) | UTR-02              | 0<br>(0.0000)       | 1<br>(0.0063)       | 0<br>(0.0000)               | 1<br>(0.0151)       | 0<br>(0.0000)       | 1<br>(0.0096)       | 1<br>(0.0037)            | 0<br>(0.0000)       | 1<br>(0.0042)       | 0<br>(0.0000)       | 0<br>(0.0000)           | 1<br>(0.0096)       | 0<br>(0.0000)                        | 1<br>(0.0166)       | 0<br>(0.0000)           | 1<br>(0.0094)       | 1<br>(0.0045)         | 0<br>(0.0000)  |
| 28                        | G010101a | 01:01:02:01             | UTR-02              | 0<br>(0.0000)       | 1<br>(0.0063)       | 1<br>(0.0032)               | 0<br>(0.0000)       | 1<br>(0.0038)       | 0<br>(0.0000)       | 1<br>(0.0037)            | 0<br>(0.0000)       | 0<br>(0.0000)       | 1<br>(0.0076)       | 0<br>(0.0000)           | 1<br>(0.0096)       | 1<br>(0.0032)                        | 0<br>(0.0000)       | 1<br>(0.0037)           | 0<br>(0.0000)       | 0<br>(0.0000)         | 0<br>(0.0000)  |
| 29                        | G010101a | 01:01:01:04             | UTR-18              | 1<br>(0.0047)       | 0<br>(0.0000)       | 1<br>(0.0032)               | 0<br>(0.0000)       | 1<br>(0.0038)       | 0<br>(0.0000)       | 0<br>(0.0000)            | 1<br>(0.0098)       | 0<br>(0.0000)       | 1<br>(0.0076)       | 1<br>(0.0038)           | 0<br>(0.0000)       | 1<br>(0.0032)                        | 0<br>(0.0000)       | 1<br>(0.0037)           | 0<br>(0.0000)       | 1<br>(0.0045)         | 0<br>(0.0000)  |
| 30                        | G010101j | 01:01:01:01             | UTR-01              | 0<br>(0.0000)       | 1<br>(0.0063)       | 1<br>(0.0032)               | 0<br>(0.0000)       | 1<br>(0.0038)       | 0<br>(0.0000)       | 0<br>(0.0000)            | 1<br>(0.0098)       | 1<br>(0.0042)       | 0<br>(0.0000)       | 1<br>(0.0038)           | 0<br>(0.0000)       | 1<br>(0.0032)                        | 0<br>(0.0000)       | 1<br>(0.0037)           | 0<br>(0.0000)       | 1<br>(0.0045)         | 0<br>(0.0000)  |
| 31                        | G010101a | 01:01:01:01             | UTR-04              | 1<br>(0.0047)       | 0<br>(0.0000)       | 0<br>(0.0000)               | 1<br>(0.0151)       | 0<br>(0.0000)       | 1<br>(0.0096)       | 1<br>(0.0037)            | 0<br>(0.0000)       | 0<br>(0.0000)       | 1<br>(0.0076)       | 1<br>(0.0038)           | 0<br>(0.0000)       | 1<br>(0.0032)                        | 0<br>(0.0000)       | 1<br>(0.0037)           | 0<br>(0.0000)       | 1<br>(0.0045)         | 0<br>(0.0000)  |
| 32                        | G010101b | 01:01:01:05             | UTR-01              | 1<br>(0.0047)       | 0<br>(0.0000)       | 1<br>(0.0032)               | 0<br>(0.0000)       | 1<br>(0.0038)       | 0<br>(0.0000)       | 1<br>(0.0037)            | 0<br>(0.0000)       | 1<br>(0.0042)       | 0<br>(0.0000)       | 1<br>(0.0038)           | 0<br>(0.0000)       | 1<br>(0.0032)                        | 0<br>(0.0000)       | 1<br>(0.0037)           | 0<br>(0.0000)       | 1<br>(0.0045)         | 0<br>(0.0000)  |
| 33                        | G010101h | 01:01:01:06             | UTR-04              | 0<br>(0.0000)       | 1<br>(0.0063)       | 1<br>(0.0032)               | 0<br>(0.0000)       | 1<br>(0.0038)       | 0<br>(0.0000)       | 0<br>(0.0000)            | 1<br>(0.0098)       | 0<br>(0.0000)       | 1<br>(0.0076)       | 1<br>(0.0038)           | 0<br>(0.0000)       | 1<br>(0.0032)                        | 0<br>(0.0000)       | 1<br>(0.0037)           | 0<br>(0.0000)       | 0<br>(0.0000)         | 0<br>(0.0000)  |
| Total [2n] *              |          |                         |                     | 212<br>(1.0000)     | 158<br>(1.0000)     | 304<br>(1.0000)             | 66<br>(1.0000)      | 266<br>(1.0000)     | 104<br>(1.0000)     | 268<br>(1.0000)          | 102<br>(1.0000)     | 238<br>(1.0000)     | 132<br>(1.0000)     | 266<br>(1.0000)         | 104<br>(1.0000)     | 306<br>(1.0000)                      | 60<br>(1.0000)      | 264<br>(1.0000)         | 106<br>(1.0000)     | 222<br>(1.0000)       | 58<br>(1.0000) |

5'URR: 5' upstream region. 3'UTR: 3' untranslated region. Freq: Frequency. Haplotypes in order of total frequency. Association of haplotypes with histopathological features of PTC was made by using Fisher's exact test and *P*-values below 0.05 are highlighted in bold.  $\phi$  Low-risk/more frequent subtypes (Classic + Follicular) or high-risk/less frequent subtypes (Oncocytic, solid, trabecular and others).  $\theta$  Information not available for 2 PTC patients (total *n* = 183). Tumor node metastasis (TNM) system refers to the primary tumor, lymph node metastasis and distant metastasis. # Information not available for 45 PTC patients (total *n* = 140). Complete (the sum of patients presenting excellent and indeterminate responses) or incomplete (the sum of patients presenting biochemical and structural incomplete responses). \* Total [2n] refers to the sum of all haplotypes within both Table 2 and Table S3.

**Table S4.** HLA-G 5'UTR, coding and 3'UTR haplotypes in papillary thyroid carcinoma (PTC) patients according to the expression of HLA-G in the tumor microenvironment [n = 170].

| HLA-G haplotypes |    | HLA-G tumor expression # |     |           |               |           |               | OR            | 95% CI                  | P             |
|------------------|----|--------------------------|-----|-----------|---------------|-----------|---------------|---------------|-------------------------|---------------|
|                  |    | Low                      |     |           | High          |           |               |               |                         |               |
|                  |    | n                        | n   | Freq.     | n             | Freq.     |               |               |                         |               |
| 5'UTR            | 1  | G010102a                 | 115 | 37        | 0.3627        | 78        | 0.3277        | 0.8564        | 0.5267 - 1.3923         | 0.5344        |
|                  | 2  | G010101a                 | 75  | 21        | 0.2059        | 54        | 0.2269        | 1.1320        | 0.6415 - 1.9972         | 0.7755        |
|                  | 3  | G0104a                   | 37  | 15        | 0.1471        | 22        | 0.0924        | 0.5907        | 0.2927 - 1.1918         | 0.1822        |
|                  | 4  | G010101f                 | 27  | 7         | 0.0686        | 20        | 0.0840        | 1.2451        | 0.5093 - 3.0435         | 0.8270        |
|                  | 5  | G010101b                 | 19  | 6         | 0.0588        | 13        | 0.0546        | 0.9244        | 0.3413 - 2.5038         | 1.0000        |
|                  | 6  | G0103a                   | 16  | 5         | 0.0490        | 11        | 0.0462        | 0.9401        | 0.3181 - 2.7780         | 1.0000        |
|                  | 7  | <b>G010101c</b>          | 15  | <b>1</b>  | <b>0.0098</b> | <b>14</b> | <b>0.0588</b> | <b>6.3125</b> | <b>0.8189 - 48.6592</b> | <b>0.0457</b> |
|                  | 8  | G010101d                 | 12  | 3         | 0.0294        | 9         | 0.0378        | 1.2969        | 0.3437 - 4.8927         | 1.0000        |
|                  | 9  | G0103e                   | 8   | 2         | 0.0196        | 6         | 0.0252        | 1.2931        | 0.2565 - 6.5171         | 1.0000        |
|                  | 10 | G0103d                   | 6   | 1         | 0.0098        | 5         | 0.0210        | 2.1674        | 0.2500 - 18.7878        | 0.6729        |
|                  | 11 | G0104b                   | 5   | 2         | 0.0196        | 3         | 0.0126        | 0.6383        | 0.1050 - 3.8786         | 0.6383        |
|                  | 12 | G010102d                 | 2   | 1         | 0.0098        | 1         | 0.0042        | 0.4262        | 0.0263 - 6.8801         | 0.5106        |
|                  | 13 | G010101g                 | 1   | 1         | 0.0098        | 0         | 0.0000        | 0.1419        | 0.0057 - 3.5117         | 0.3000        |
|                  | 14 | G010101j                 | 1   | 0         | 0.0000        | 1         | 0.0042        | 1.2947        | 0.0523 - 32.0496        | 1.0000        |
|                  | 15 | G010101h                 | 1   | 0         | 0.0000        | 1         | 0.0042        | 1.2947        | 0.0523 - 32.0496        | 1.0000        |
| Total [2n]       |    | 340                      | 102 | 1.0000    | 238           | 1.0000    | -             | -             | -                       |               |
| Coding           | 1  | G*01:01:01:01            | 76  | 21        | 0.2059        | 55        | 0.2311        | 1.1593        | 0.6577 - 2.0431         | 0.6713        |
|                  | 2  | <b>G*01:01:02:01</b>     | 67  | <b>29</b> | <b>0.2843</b> | <b>38</b> | <b>0.1597</b> | <b>0.4783</b> | <b>0.2752 - 0.8311</b>  | <b>0.0111</b> |
|                  | 3  | G*01:01:01:05            | 32  | 7         | 0.0686        | 25        | 0.1050        | 1.5929        | 0.6658 - 3.8108         | 0.4173        |
|                  | 4  | G*01:03:01:02            | 30  | 8         | 0.0784        | 22        | 0.0924        | 1.1968        | 0.5142 - 2.7850         | 0.8353        |
|                  | 5  | G*01:01:01:04            | 25  | 6         | 0.0588        | 19        | 0.0798        | 1.3881        | 0.5375 - 3.5845         | 0.6513        |
|                  | 6  | G*1:04:01                | 23  | 11        | 0.1078        | 12        | 0.0504        | 0.4393        | 0.1870 - 1.0313         | 0.0616        |
|                  | 7  | G*1:04:04                | 19  | 6         | 0.0588        | 13        | 0.0546        | 0.9244        | 0.3413 - 2.5038         | 1.0000        |
|                  | 8  | G*1:06                   | 15  | 4         | 0.0392        | 11        | 0.0462        | 1.1872        | 0.3689 - 3.8200         | 1.0000        |
|                  | 9  | G*01:05N                 | 13  | 2         | 0.0196        | 11        | 0.0462        | 2.4229        | 0.5273 - 11.1323        | 0.3583        |
|                  | 10 | G*01:01:03:03            | 13  | 2         | 0.0196        | 11        | 0.0462        | 2.4229        | 0.5273 - 11.1323        | 0.3583        |
|                  | 11 | G*01:01:01:08            | 8   | 3         | 0.0294        | 5         | 0.0210        | 0.7082        | 0.1660 - 3.0205         | 0.7007        |
|                  | 12 | G*01:01:22:01            | 7   | 0         | 0.0000        | 7         | 0.0294        | 6.6415        | 0.3757 - 117.3865       | 0.1076        |
|                  | 13 | G*01:01:01:15            | 4   | 0         | 0.0000        | 4         | 0.0168        | 3.9339        | 0.2098 - 73.7422        | 0.3207        |
|                  | 14 | G*01:01:15compatible     | 2   | 0         | 0.0000        | 2         | 0.0084        | 2.1670        | 0.1031 - 45.5380        | 1.0000        |
|                  | 15 | G*01:01:01:13            | 2   | 1         | 0.0098        | 1         | 0.0042        | 0.4262        | 0.0263 - 6.8801         | 0.5106        |
|                  | 16 | G*01:01:17               | 2   | 1         | 0.0098        | 1         | 0.0042        | 0.4262        | 0.0263 - 6.8801         | 0.5106        |
|                  | 17 | G*01:01:01:06            | 1   | 0         | 0.0000        | 1         | 0.0042        | 1.2947        | 0.0523 - 32.0496        | 1.0000        |
|                  | 18 | G*01:01:02:01(+2798G)    | 1   | 1         | 0.0098        | 0         | 0.0000        | 0.1419        | 0.0057 - 3.5117         | 0.3000        |
| Total [2n]       |    | 340                      | 102 | 1.0000    | 238           | 1.0000    | -             | -             | -                       |               |
| 3'UTR            | 1  | UTR-02                   | 105 | 37        | 0.3627        | 68        | 0.2857        | 0.7027        | 0.4296 - 1.1492         | 0.1616        |
|                  | 2  | UTR-01                   | 86  | 23        | 0.2255        | 63        | 0.2647        | 1.2365        | 0.7159 - 2.1355         | 0.4975        |
|                  | 3  | UTR-03                   | 41  | 16        | 0.1569        | 25        | 0.1050        | 0.6309        | 0.3210 - 1.2398         | 0.2039        |
|                  | 4  | UTR-04                   | 33  | 7         | 0.0686        | 26        | 0.1092        | 1.6644        | 0.6980 - 3.9686         | 0.3186        |
|                  | 5  | UTR-05                   | 30  | 8         | 0.0784        | 22        | 0.0924        | 1.1968        | 0.5142 - 2.7850         | 0.8353        |
|                  | 6  | UTR-06                   | 18  | 5         | 0.0490        | 13        | 0.0546        | 1.1209        | 0.3889 - 3.2305         | 1.0000        |
|                  | 7  | UTR-07                   | 13  | 2         | 0.0196        | 11        | 0.0462        | 2.4229        | 0.5273 - 11.1323        | 0.3583        |
|                  | 8  | UTR-18                   | 11  | 3         | 0.0294        | 8         | 0.0336        | 1.1478        | 0.2982 - 4.4172         | 1.0000        |
|                  | 9  | UTR-20                   | 2   | 0         | 0.0000        | 2         | 0.0084        | 2.1670        | 0.1031 - 45.5380        | 1.0000        |
|                  | 10 | UTR-13                   | 1   | 1         | 0.0098        | 0         | 0.0000        | 0.1419        | 0.0057 - 3.5117         | 0.3000        |
| Total [2n]       |    | 340                      | 102 | 1.0000    | 238           | 1.0000    | -             | -             | -                       |               |

5'UTR: 5' upstream region. 3'UTR: 3' untranslated region. OR: Odds Ratio. CI: Confidence Interval. Freq: Frequency. Haplotypes in order of total frequency. Association of haplotypes with HLA-G tumor expression was made by using Fisher's exact test and P-values below 0.05 are highlighted in bold. # Low ( $\leq 50\%$  of positive tumor cells) or high ( $> 50\%$  of positive tumor cells).

**Table S5.** HLA-G 5'UTR, coding and 3'UTR haplotypes in papillary thyroid carcinoma (PTC) patients according to sHLA-G detection in plasma before thyroidectomy [n = 84].

| HLA-G haplotypes |    | sHLA-G                |    |            |        |        | OR     | 95% CI  | P                 |        |
|------------------|----|-----------------------|----|------------|--------|--------|--------|---------|-------------------|--------|
|                  |    | Undetectable          |    | Detectable |        |        |        |         |                   |        |
|                  |    | n                     | n  | Fr̄eq.     | n      | Fr̄eq. |        |         |                   |        |
| 5'UTR            | 1  | G010102a              | 59 | 33         | 0.4125 | 26     | 0.2955 | 0.5973  | 0.3153 - 1.1311   | 0.1452 |
|                  | 2  | G010101a              | 30 | 12         | 0.1500 | 18     | 0.2045 | 1.4571  | 0.6527 - 3.2528   | 0.4221 |
|                  | 3  | G0104a                | 18 | 8          | 0.1000 | 10     | 0.1136 | 1.1538  | 0.4316 - 3.0846   | 0.8081 |
|                  | 4  | G010101f              | 14 | 6          | 0.0750 | 8      | 0.0909 | 1.2333  | 0.4086 - 3.7225   | 0.7850 |
|                  | 5  | G010101b              | 8  | 4          | 0.0500 | 4      | 0.0455 | 0.9048  | 0.2186 - 3.7439   | 1.0000 |
|                  | 6  | G0103a                | 8  | 2          | 0.0250 | 6      | 0.0682 | 2.8537  | 0.5590 - 14.5654  | 0.2817 |
|                  | 7  | G010101c              | 7  | 3          | 0.0375 | 4      | 0.0455 | 1.2222  | 0.2650 - 5.6362   | 1.0000 |
|                  | 8  | G010101d              | 7  | 3          | 0.0375 | 4      | 0.0455 | 1.2222  | 0.2650 - 5.6362   | 1.0000 |
|                  | 9  | G0103e                | 7  | 3          | 0.0375 | 4      | 0.0455 | 1.2222  | 0.2650 - 5.6362   | 1.0000 |
|                  | 10 | G0104b                | 5  | 3          | 0.0375 | 2      | 0.0227 | 0.5969  | 0.0971 - 3.6671   | 0.6698 |
|                  | 11 | G0103d                | 4  | 3          | 0.0375 | 1      | 0.0114 | 0.2950  | 0.0300 - 2.8954   | 0.3480 |
|                  | 12 | G010101h              | 1  | 0          | 0.0000 | 1      | 0.0114 | 2.7600  | 0.1108 - 68.7254  | 1.0000 |
| Total [2n]       |    | 168                   | 80 | 1.0000     | 88     | 1.0000 | -      | -       | -                 |        |
| Coding           | 1  | G*01:01:01:01         | 29 | 12         | 0.1500 | 17     | 0.1932 | 1.3568  | 0.6033 - 3.0510   | 0.5417 |
|                  | 2  | G*01:01:02:01         | 28 | 19         | 0.2375 | 9      | 0.1023 | 0.3658  | 0.1546 - 0.8648   | 0.0228 |
|                  | 3  | G*01:03:01:02         | 19 | 8          | 0.1000 | 11     | 0.1250 | 1.2857  | 0.4894 - 3.3772   | 0.6355 |
|                  | 4  | G*01:01:01:05         | 15 | 7          | 0.0875 | 8      | 0.0909 | 1.0429  | 0.3602 - 3.0185   | 1.0000 |
|                  | 5  | G*1:04:01             | 15 | 6          | 0.0750 | 9      | 0.1023 | 1.4051  | 0.4768 - 4.1397   | 0.5968 |
|                  | 6  | G*01:01:01:04         | 15 | 6          | 0.0750 | 9      | 0.1023 | 1.4051  | 0.4768 - 4.1397   | 0.5968 |
|                  | 7  | G*1:04:04             | 8  | 5          | 0.0625 | 3      | 0.0341 | 0.5294  | 0.1223 - 2.2902   | 0.4802 |
|                  | 8  | G*01:05N              | 8  | 4          | 0.0500 | 4      | 0.0455 | 0.9048  | 0.2186 - 3.7439   | 1.0000 |
|                  | 9  | G*1:06                | 8  | 6          | 0.0750 | 2      | 0.0227 | 0.2868  | 0.0561 - 1.4641   | 0.1528 |
|                  | 10 | G*01:01:03:03         | 7  | 2          | 0.0250 | 5      | 0.0568 | 2.3494  | 0.4428 - 12.4641  | 0.4470 |
|                  | 11 | G*01:01:01:08         | 5  | 3          | 0.0375 | 2      | 0.0227 | 0.5969  | 0.0971 - 3.6671   | 0.6698 |
|                  | 12 | G*01:01:22:01         | 5  | 2          | 0.0250 | 3      | 0.0341 | 1.3765  | 0.2240 - 8.4563   | 1.0000 |
|                  | 13 | G*01:01:01:15         | 2  | 0          | 0.0000 | 2      | 0.0227 | 4.6532  | 0.2200 - 98.4006  | 0.4981 |
|                  | 14 | G*01:01:17            | 2  | 0          | 0.0000 | 2      | 0.0227 | 4.6532  | 0.2200 - 98.4006  | 0.4981 |
|                  | 15 | G*01:01:01:06         | 1  | 0          | 0.0000 | 1      | 0.0114 | 2.7600  | 0.1108 - 68.7254  | 1.0000 |
|                  | 16 | G*01:01:02:01(+2798G) | 1  | 0          | 0.0000 | 1      | 0.0114 | 2.7600  | 0.1108 - 68.7254  | 1.0000 |
| Total [2n]       |    | 168                   | 80 | 1.0000     | 88     | 1.0000 | -      | -       | -                 |        |
| 3'UTR            | 1  | UTR-02                | 52 | 31         | 0.3875 | 21     | 0.2386 | 0.4954  | 0.2547 - 0.9636   | 0.0453 |
|                  | 2  | UTR-01                | 35 | 14         | 0.1750 | 21     | 0.2386 | 1.4776  | 0.6931 - 3.1496   | 0.3458 |
|                  | 3  | UTR-03                | 23 | 11         | 0.1375 | 12     | 0.1364 | 0.9904  | 0.4105 - 2.3894   | 1.0000 |
|                  | 4  | UTR-05                | 19 | 8          | 0.1000 | 11     | 0.1250 | 1.2857  | 0.4894 - 3.3772   | 0.6355 |
|                  | 5  | UTR-04                | 16 | 8          | 0.1000 | 8      | 0.0909 | 0.9000  | 0.3211 - 2.5219   | 1.0000 |
|                  | 6  | UTR-06                | 9  | 5          | 0.0625 | 4      | 0.0455 | 0.7143  | 0.1849 - 2.7584   | 0.7377 |
|                  | 7  | UTR-07                | 7  | 2          | 0.0250 | 5      | 0.0568 | 2.3494  | 0.4428 - 12.4641  | 0.4470 |
|                  | 8  | UTR-18                | 6  | 0          | 0.0000 | 6      | 0.0682 | 12.6848 | 0.7030 - 228.8785 | 0.0295 |
|                  | 9  | UTR-20                | 1  | 1          | 0.0125 | 0      | 0.0000 | 0.2994  | 0.0120 - 7.4562   | 0.4762 |
| Total [2n]       |    | 168                   | 80 | 1.0000     | 88     | 1.0000 | -      | -       | -                 |        |

5'UTR: 5' upstream region. 3'UTR: 3' untranslated region. OR: Odds Ratio. CI: Confidence Interval. Freq: Frequency. Haplotypes in order of total frequency. Association of haplotypes with sHLA-G detection was made by using Fisher's exact test and *P*-values below 0.05 are highlighted in bold.
